# Supplementary material
Source: PubMed Central journal article supplement (PMC4267348)
Supplement: pnas.201420515SI.pdf [file pnas.201420515SI.pdf]

# Supporting Information

Groth et al. 10.1073/pnas.1420515111

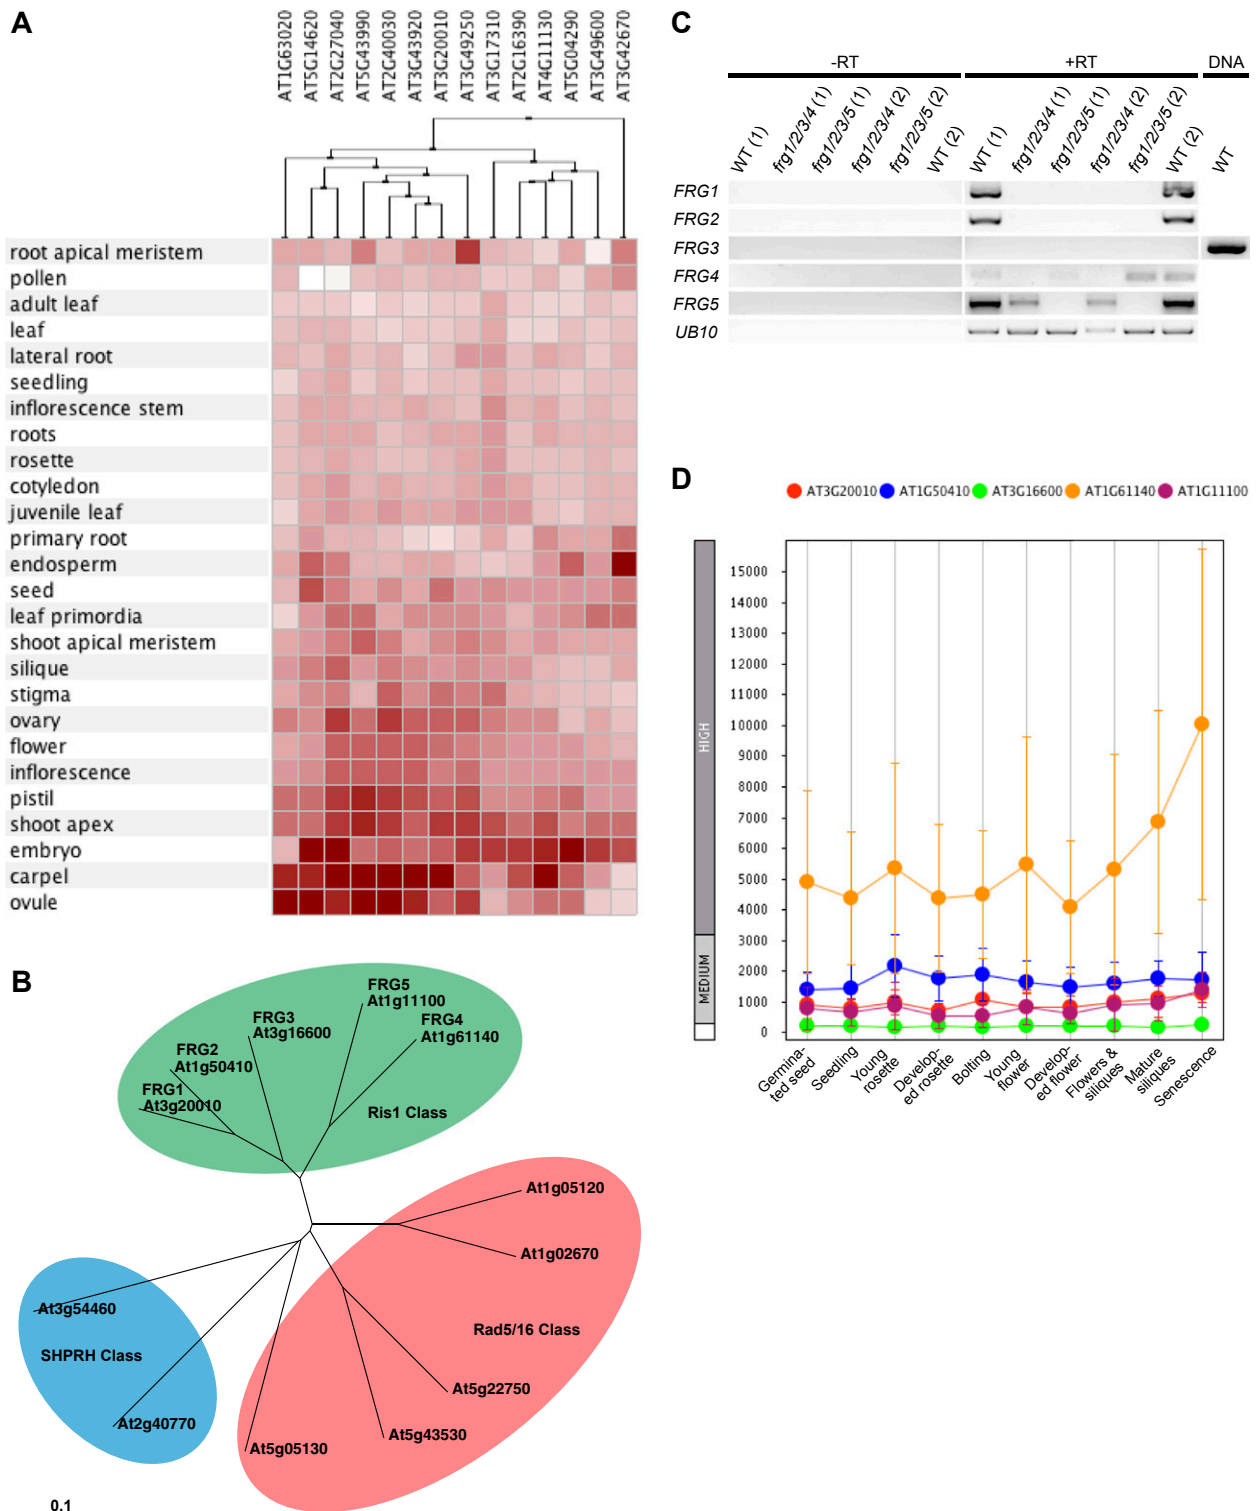

**Fig. S1.** Expression patterns of RdDM genes and the *FRG* gene family. (A) Hierarchical cluster analysis of expression levels of 14 RdDM genes, including *FRG1*, in 26 different anatomical parts from microarray data (ATH1). (B) Phylogenetic tree (neighbor joining) of *FRG1* to *FRG5* proteins. (C) Confirmation of T-DNA insertion mutants by RT-PCR on PCR template without reverse transcription (-RT), cDNA (+RT), and DNA template. Ubiquitin (*UB10*) was used as control. (D) Mean expression levels ( $\pm$ SD) of *FRG* family members from microarray data (ATH1) by developmental stage/tissue.

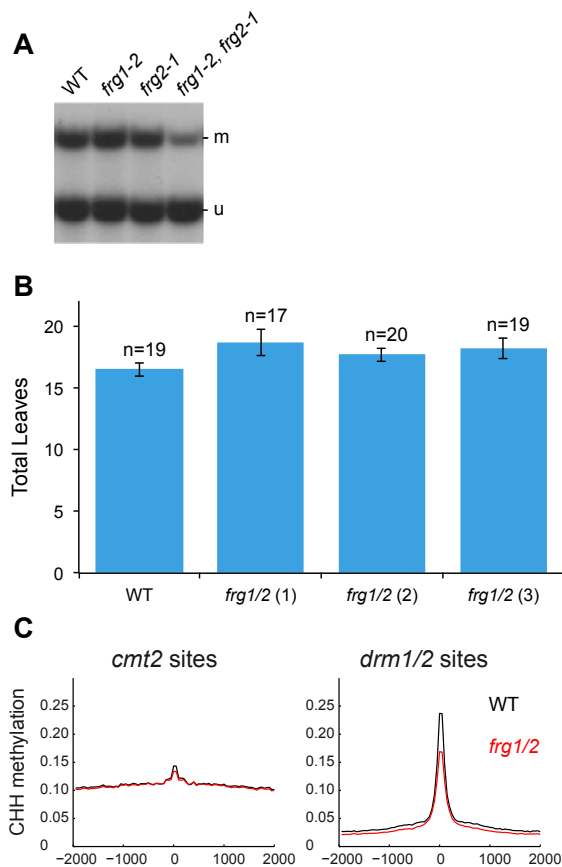

**Fig. S2.** Analysis of DNA methylation in *frg1/2* double-mutants. (A) DNA blot analysis of CHG methylation at the MEA-ISR in wild-type, as well as *frg1-2* and *frg2-1* single- and double-mutants. Genomic DNA has been digested with the methylation sensitive enzyme *MspI*; the upper and lower bands correspond to methylated (m) and unmethylated (u) fractions, respectively. (B) Flowering time (mean ± SE) of T1 offspring of wild-type and *frg1/2* double-mutants transformed with an unmethylated FWA transgene. Numbers in parentheses indicate individual lines. (C) Average distribution of CHH methylation levels over *cmt2* and *drm1/2* CHH hypo DMRs. The x axis indicates distance from the DMR midpoints in base pairs. The *frg1-1* mutant allele has been used for all experiments, unless indicated differently.

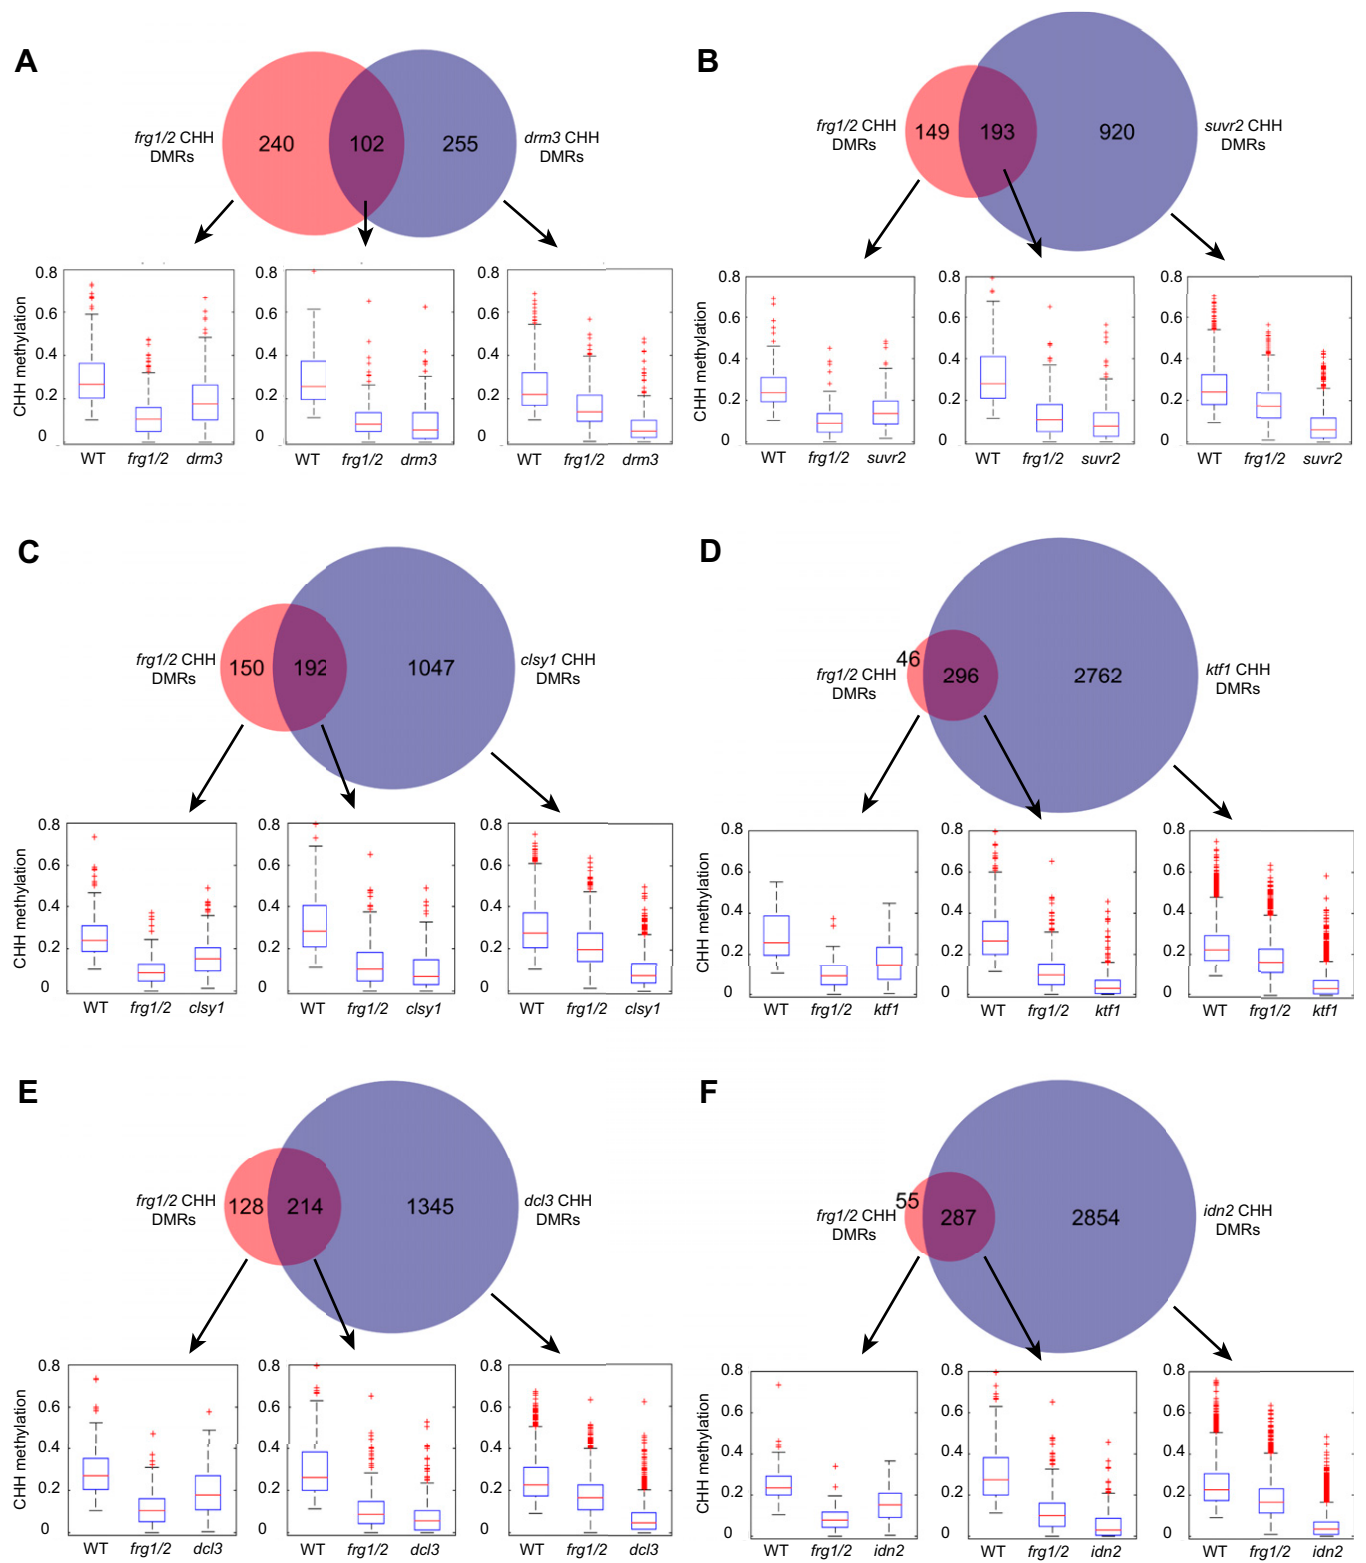

**Fig. S3.** *frg1/2* double mutants show general reduction in CHH methylation. Overlap between *frg1/2* and *drm3* (A), *svr2* (B), *clsy1* (C), *ktf1* (D), *dcl3* (E), or *idn2* (F) CHH hypo-DMRs. Box plots show CHH methylation levels in the respective DMR fractions.

MEA-ISR

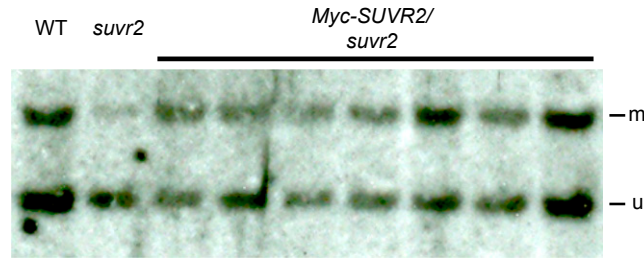

Fig. S4. DNA blot showing that Myc-tagged SUVR2 complements the DNA methylation defect of *suvr2* at the *MEA-ISR* locus. Seven individual T1 lines are shown.

Table S1. List of genes that coexpress with RdDM genes and corresponding coexpression coefficient

| <i>DCL3</i> | <i>DRM2</i> | <i>RDR2</i> | <i>AGO4</i> | <i>NRPE2</i> | <i>NRPD1</i> | <i>NRPE1</i> | <i>DRD1</i> | <i>IDN2</i> | <i>DRM3</i> | <i>DMS3</i> | <i>RDM1</i> | <i>KTF1</i> | <i>DMS4</i> | <i>IDP2</i> | <i>SUVR2</i> | Count | Gene*            |
|-------------|-------------|-------------|-------------|--------------|--------------|--------------|-------------|-------------|-------------|-------------|-------------|-------------|-------------|-------------|--------------|-------|------------------|
| 0.751       | 0.646       |             | 0.766       | 0.677        |              |              |             |             |             | 0.698       |             | 0.619       | 0.657       | 0.574       | 0.661        | 9     | <b>FRG1</b>      |
| 0.749       |             |             | 0.752       | 0.675        |              |              |             |             | 0.647       | 0.706       |             | 0.635       | 0.681       |             |              | 7     | <u>U.K.L1</u>    |
| 0.739       |             | 0.905       |             | 0.704        | 0.704        |              |             |             |             |             |             | 0.671       | 0.765       |             |              | 6     | <u>AT5G25475</u> |
|             | 0.74        |             | 0.591       |              | 0.674        |              |             | 0.718       | 0.619       |             |             | 0.634       |             |             |              | 6     | <u>ROS3</u>      |
| 0.708       | 0.641       |             |             |              |              |              |             |             | 0.627       |             |             | 0.626       | 0.657       | 0.679       |              | 6     | <u>AT3G15120</u> |
| 0.74        |             | 0.845       |             |              |              |              |             | 0.782       |             |             |             | 0.672       | 0.810       |             |              | 5     | <b>IDP2</b>      |
| 0.75        |             | 0.845       |             |              |              |              |             | 0.781       |             |             |             | 0.671       | 0.795       |             |              | 5     | <b>IDP1</b>      |
| 0.728       |             |             |             |              |              |              |             | 0.892       |             |             |             | 0.62        | 0.812       | 0.658       |              | 5     | <b>RDR2</b>      |
| 0.738       |             |             | 0.759       |              | 0.654        |              |             |             |             | 0.698       |             | 0.663       |             |             |              | 5     | <b>SUVR2</b>     |
|             |             | 0.817       |             |              |              |              |             | 0.84        |             |             |             | 0.583       | 0.647       | 0.6         |              | 5     | <u>AT1G18950</u> |
| 0.675       |             |             | 0.756       | 0.669        |              |              |             |             |             | 0.69        |             | 0.616       |             |             |              | 5     | <u>AT5G14610</u> |
|             | 0.644       | 0.785       |             |              |              |              |             |             | 0.619       |             |             | 0.591       | 0.724       |             |              | 5     | <u>CHR11</u>     |
|             | 0.74        |             |             |              |              | 0.596        | 0.665       | 0.71        |             |             |             | 0.603       |             |             |              | 5     | <u>AT5G58120</u> |
| 0.683       |             | 0.782       |             |              |              |              |             | 0.81        |             |             |             | 0.592       | 0.687       |             |              | 5     | <u>AT1G65370</u> |
|             |             | 0.811       |             |              |              |              |             | 0.858       |             |             |             |             | 0.666       | 0.881       |              | 4     | <u>AT1G10250</u> |
|             |             | 0.794       |             |              |              |              |             | 0.798       |             |             |             | 0.584       | 0.651       |             |              | 4     | <u>SPT16</u>     |
|             |             |             |             |              |              |              | 0.77        |             | 0.699       | 0.694       |             | 0.624       |             |             |              | 4     | <b>NRPD2</b>     |
|             |             |             | 0.765       |              |              |              |             |             | 0.652       |             |             | 0.606       | 0.721       |             |              | 4     | <u>AT5G43820</u> |
| 0.701       |             |             |             |              | 0.683        |              |             |             | 0.693       | 0.662       |             |             |             |             |              | 4     | <u>GIP1</u>      |
| 0.682       |             |             |             |              |              |              |             | 0.722       |             |             |             | 0.637       | 0.674       |             |              | 4     | <u>AT1G03830</u> |
|             | 0.659       |             |             |              | 0.661        |              |             |             | 0.637       |             | 0.677       |             |             |             |              | 4     | <u>SUS2</u>      |
|             |             |             |             |              | 0.666        |              |             |             | 0.677       |             |             | 0.599       |             | 0.55        |              | 4     | <u>TPR9</u>      |
|             |             |             |             |              | 0.747        |              | 0.713       |             |             | 0.714       |             |             |             |             |              | 3     | <u>OSD1</u>      |
|             |             |             |             |              | 0.663        |              | 0.772       |             | 0.66        |             |             |             |             |             |              | 3     | <u>BET10</u>     |
|             |             |             |             |              | 0.687        |              | 0.678       |             |             | 0.704       |             |             |             |             |              | 3     | <u>AT4G22860</u> |
|             |             |             |             |              | 0.657        |              |             |             |             |             |             | 0.631       | 0.74        |             |              | 3     | <b>DCL3</b>      |
|             |             |             |             |              | 0.678        |              | 0.675       |             | 0.669       |             |             |             |             |             |              | 3     | <u>AT2G25740</u> |
|             |             |             |             |              | 0.694        |              |             |             |             |             |             | 0.595       |             | 0.701       |              | 3     | <b>DRM3</b>      |
|             |             |             |             |              | 0.659        |              |             |             |             | 0.659       |             | 0.601       |             |             |              | 3     | <b>HMT2</b>      |

\*Bold font indicates that gene is known component of RdDM; underlining indicates that that gene has a closely related gene in the *Arabidopsis* genome.

Table S2. Quantification of FRG1 and SUVR2 peptides identified by coimmunoprecipitation and mass spectrometry of cell extract from FRG1-FLAG expressing *Arabidopsis*

| Replicate        | M.W.*<br>(kDa) | Spectra <sup>†</sup> |        |       |        | Unique peptides |        |       |        | NSAfe5 <sup>‡</sup> |        |       |        | % FRG1 <sup>§</sup> |        |       |        |
|------------------|----------------|----------------------|--------|-------|--------|-----------------|--------|-------|--------|---------------------|--------|-------|--------|---------------------|--------|-------|--------|
|                  |                | First                | Second | Third | Fourth | First           | Second | Third | Fourth | First               | Second | Third | Fourth | First               | Second | Third | Fourth |
| FRG1: At3g20010  | 115.5          | 338                  | 292    | 41    | 78     | 31              | 53     | 29    | 26     | 2,136               | 490    | 199   | 697    | 100                 | 100    | 100   | 100    |
| SUVR2: At5g43990 | 82.0           | 13                   | 36     | 6     | 3      | 7               | 26     | 6     | 3      | 118                 | 86     | 42    | 38     | 5.5                 | 17.6   | 21.2  | 5.5    |

\*Molecular weight in kilodalton.

<sup>†</sup>Total number of peptides per gene.

<sup>‡</sup>Spectral counts normalized to protein length and sample complexity.

<sup>§</sup>NSAfe5 values relative to FRG1 in percent.

**Table S3. Read statistics for bisulfite, mRNA, and smRNA sequencing**

| Bisulfite sequencing           | Raw reads   | False positive rate (chloroplast)              |
|--------------------------------|-------------|------------------------------------------------|
| <i>frg1 frg2</i>               | 295,072,635 | mCG = 0.76%<br>mCHG = 0.73%<br>mCHH = 0.48%    |
| mRNA-seq                       |             | Uniquely mapped reads                          |
| WT, replicate 1                | 23,862,024  | 21,836,316                                     |
| WT, replicate 2                | 24,362,091  | 22,156,201                                     |
| WT, replicate 3                | 22,556,627  | 20,503,528                                     |
| <i>frg1 frg2</i> , replicate 1 | 24,431,834  | 22,231,394                                     |
| <i>frg1 frg2</i> , replicate 2 | 22,800,646  | 20,723,455                                     |
| <i>frg1 frg2</i> , replicate 3 | 22,673,935  | 20,630,999                                     |
| smRNA-seq                      |             | Uniquely mapped reads in size classes 18–34 nt |
| WT, replicate 1                | 15,125,244  | 6,413,067                                      |
| WT, replicate 2                | 20,330,633  | 8,396,833                                      |
| WT, replicate 3                | 16,638,823  | 7,733,505                                      |
| <i>frg1 frg2</i> , replicate 1 | 16,253,897  | 7,132,876                                      |
| <i>frg1 frg2</i> , replicate 2 | 14,696,182  | 6,501,880                                      |
| <i>frg1 frg2</i> , replicate 3 | 16,442,801  | 6,762,502                                      |
| <i>frg1to5</i> , replicate 1   | 16,443,065  | 6,834,495                                      |
| <i>frg1to5</i> , replicate 2   | 17,912,561  | 7,563,709                                      |
| <i>frg1to5</i> , replicate 3   | 15,282,482  | 6,428,431                                      |
| <i>suvr2</i> , replicate 1     | 17,288,074  | 7,422,332                                      |
| <i>suvr2</i> , replicate 2     | 17,435,948  | 5,943,106                                      |
| <i>suvr2</i> , replicate 3     | 23,194,034  | 9,676,255                                      |
| <i>dcl3</i> , replicate 1      | 24,860,052  | 8,185,932                                      |
| <i>dcl3</i> , replicate 2      | 20,365,508  | 6,511,050                                      |
| <i>dcl3</i> , replicate 3      | 22,444,088  | 5,654,602                                      |
| <i>drm1 drm2</i> , replicate 1 | 23,940,572  | 9,274,756                                      |
| <i>drm1 drm2</i> , replicate 2 | 23,071,493  | 8,502,891                                      |
| <i>drm1 drm2</i> , replicate 3 | 22,453,773  | 6,884,763                                      |

## Other Supporting Information Files

[Dataset S1 \(XLSX\)](#)
